# Supplementary material
Source: PubMed Central journal article supplement (PMC8216505)

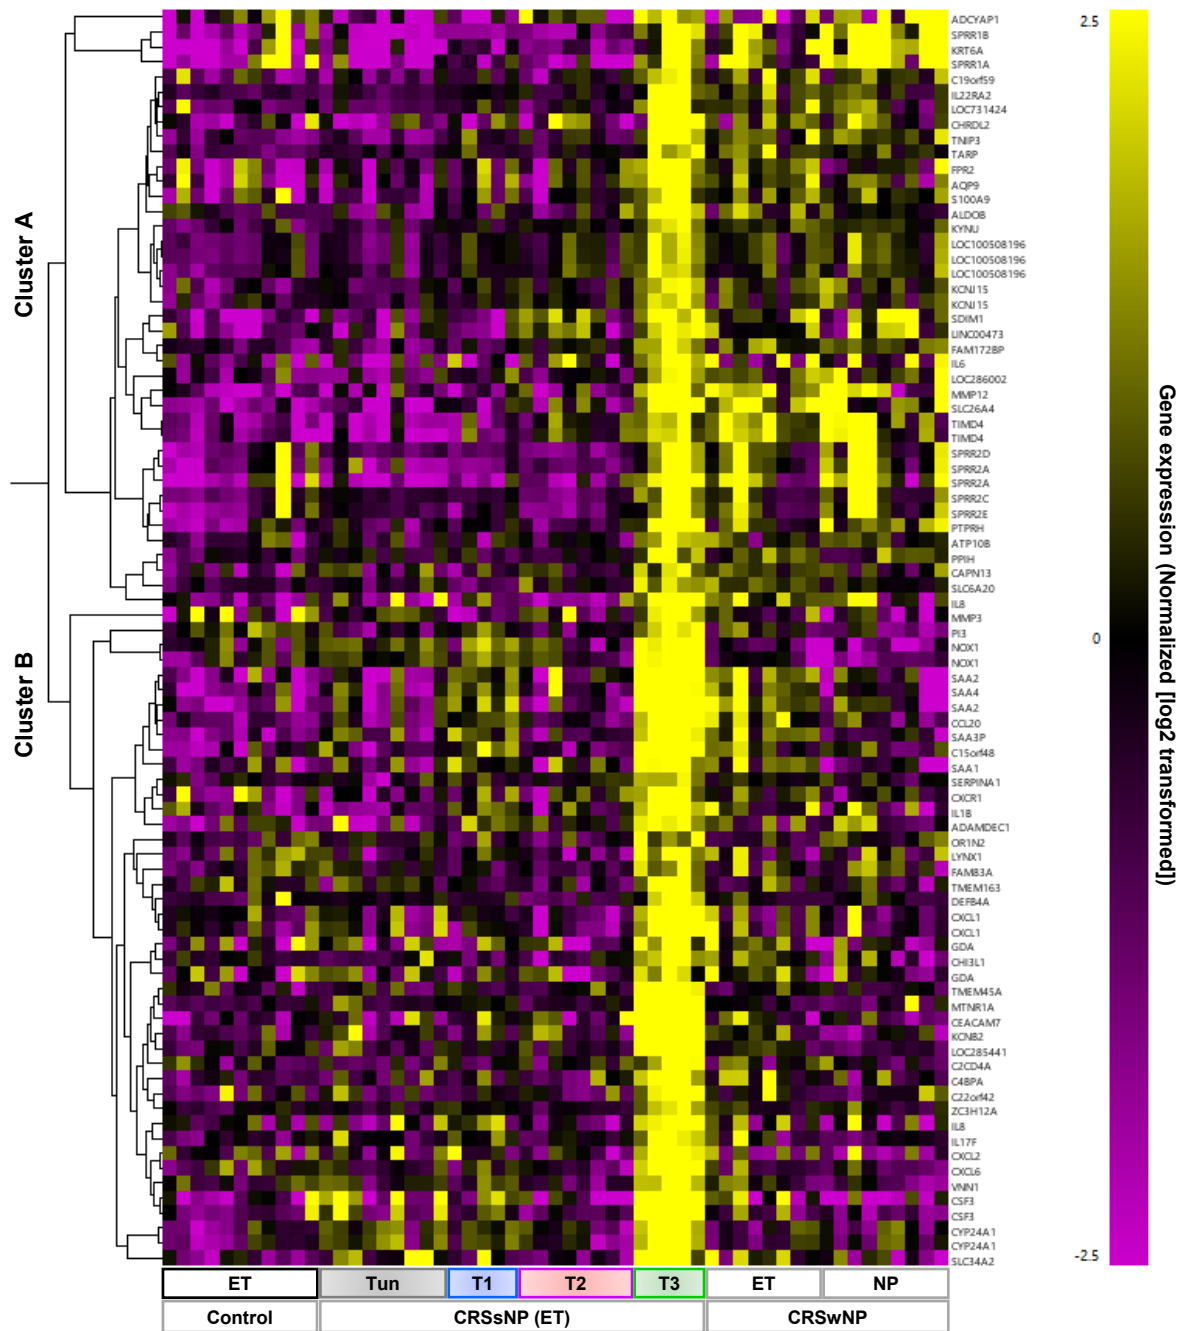

Supplement: NIHMS1702035-supplement-Supplementary_Figure_E4.pdf [file NIHMS1702035-supplement-Supplementary_Figure_E4.pdf]
